# Supplementary material for: Global assessment of the quality of care index for Burkitt Lymphoma from 1990 to 2021
Source: Research Square preprint supplement (doi:10.21203/rs.3.rs-7944023/v1), 2025-12-08
Supplement: Supplementary file 1 [file 231a32e79f8cf8c79907d590.docx]

Supplementary Table 2. The average QCI value of 204 countries worldwide.

|  | **Country** | **Average QCI** |
| --- | --- | --- |
| 1 | United Kingdom | 89.06741948116740 |
| 2 | Cyprus | 88.87359011039620 |
| 3 | United States of America | 88.65956311278300 |
| 4 | Japan | 88.42555936757300 |
| 5 | Netherlands | 88.10255901317820 |
| 6 | Canada | 88.0864680756861 |
| 7 | Luxembourg | 88.04146506446180 |
| 8 | Greece | 87.97162606147500 |
| 9 | Sweden | 87.11493343589490 |
| 10 | Monaco | 86.44678200241260 |
| 11 | Andorra | 86.09670044400970 |
| 12 | Belgium | 86.08455693920310 |
| 13 | Italy | 85.52527383035830 |
| 14 | San Marino | 85.22560497874580 |
| 15 | Germany | 84.91089185910140 |
| 16 | Spain | 84.82216558385260 |
| 17 | France | 84.70970598061520 |
| 18 | Australia | 84.68605105669580 |
| 19 | Ireland | 84.61341253637470 |
| 20 | Israel | 84.41742490509400 |
| 21 | Denmark | 84.4147156222951 |
| 22 | Norway | 84.40807634783650 |
| 23 | Iceland | 84.25509093331410 |
| 24 | Croatia | 84.1365950975646 |
| 25 | Austria | 84.017594467783 |
| 26 | New Zealand | 83.97668552191540 |
| 27 | Switzerland | 83.73670759746840 |
| 28 | Singapore | 83.70489396829140 |
| 29 | Malta | 82.60118436680970 |
| 30 | Finland | 82.29504951907860 |
| 31 | Portugal | 82.19443073511400 |
| 32 | Montenegro | 80.02358201212120 |
| 33 | North Macedonia | 80.0107031253883 |
| 34 | Republic of Korea | 79.82785960784810 |
| 35 | Northern Mariana Islands | 79.82081684398740 |
| 36 | Slovenia | 79.38884183849770 |
| 37 | Czechia | 79.01907423127380 |
| 38 | Cook Islands | 78.31982228261950 |
| 39 | Hungary | 77.83218940871340 |
| 40 | Poland | 76.6182802638658 |
| 41 | Serbia | 75.48789559853630 |
| 42 | Slovakia | 74.95816799315150 |
| 43 | Bermuda | 74.69057920841120 |
| 44 | Seychelles | 74.6079623907396 |
| 45 | Taiwan (Province of China) | 73.9714996428846 |
| 46 | Mauritius | 71.74218756583210 |
| 47 | Bulgaria | 71.20062325519960 |
| 48 | Chile | 71.0507902850657 |
| 49 | Puerto Rico | 70.81316052332360 |
| 50 | Guam | 70.38120295717090 |
| 51 | Greenland | 70.16252327536960 |
| 52 | Bosnia and Herzegovina | 69.82472785800330 |
| 53 | Uruguay | 69.2692529766315 |
| 54 | Romania | 69.26089692856610 |
| 55 | Brunei Darussalam | 68.10478438948810 |
| 56 | Qatar | 67.30175619679170 |
| 57 | Palau | 67.12043071319050 |
| 58 | Sri Lanka | 66.05037697114010 |
| 59 | Kuwait | 66.0303470362801 |
| 60 | Cuba | 65.93131488283160 |
| 61 | Maldives | 65.72572110313920 |
| 62 | Estonia | 65.60859672377150 |
| 63 | Albania | 64.74046756335770 |
| 64 | Costa Rica | 64.38004766952700 |
| 65 | Barbados | 64.1187453896499 |
| 66 | Argentina | 64.00231842441880 |
| 67 | Bahrain | 63.84578447364810 |
| 68 | Lithuania | 63.81546778471840 |
| 69 | United States Virgin Islands | 62.83313626392710 |
| 70 | Latvia | 62.40654157657430 |
| 71 | Antigua and Barbuda | 61.6746655079338 |
| 72 | China | 61.23798748164830 |
| 73 | Russian Federation | 60.24187817678550 |
| 74 | Belarus | 59.36247707752120 |
| 75 | Panama | 58.77865350739610 |
| 76 | Armenia | 58.75849745958680 |
| 77 | American Samoa | 58.42474072743880 |
| 78 | Ukraine | 57.87285982238280 |
| 79 | Georgia | 57.28471723278020 |
| 80 | Jamaica | 56.13931633918950 |
| 81 | Thailand | 55.99154648834470 |
| 82 | Oman | 54.98476161079530 |
| 83 | Bahamas | 54.65001171469890 |
| 84 | Malaysia | 54.5096718128973 |
| 85 | Venezuela (Bolivarian Republic) | 54.4509581927399 |
| 86 | United Arab Emirates | 54.37730162134030 |
| 87 | Republic of Moldova | 54.01808786794000 |
| 88 | Mexico | 54.01390670980140 |
| 89 | Niue | 53.9230913301434 |
| 90 | Lebanon | 53.87141265134110 |
| 91 | Iran (Islamic Republic) | 53.41372734094780 |
| 92 | Colombia | 53.04989196236030 |
| 93 | El Salvador | 52.30501927858950 |
| 94 | Tokelau | 52.06882200066650 |
| 95 | Saint Lucia | 51.85487881124600 |
| 96 | Jordan | 50.90316129710210 |
| 97 | Tonga | 50.78437814908120 |
| 98 | Saint Kitts and Nevis | 50.73132304056050 |
| 99 | Syrian Arab Republic | 50.19575860495490 |
| 100 | Turkey | 50.1428785977831 |
| 101 | Trinidad and Tobago | 49.7919872776738 |
| 102 | Grenada | 49.70535980374030 |
| 103 | Dominica | 49.39423412856560 |
| 104 | Brazil | 48.48033322536780 |
| 105 | Palestine | 47.90738662569200 |
| 106 | Saudi Arabia | 47.66702626404290 |
| 107 | Tunisia | 47.01322930412500 |
| 108 | Saint Vincent and the Grenadines | 46.93448481178560 |
| 109 | Peru | 46.88887599501030 |
| 110 | Belize | 46.72127200342430 |
| 111 | Paraguay | 46.14502235659780 |
| 112 | Kazakhstan | 45.93671947922650 |
| 113 | Nicaragua | 45.64550381832390 |
| 114 | Libya | 45.21438673790870 |
| 115 | Fiji | 44.98865438536950 |
| 116 | Solomon Islands | 44.94369791147830 |
| 117 | Vanuatu | 44.8382119932147 |
| 118 | Philippines | 44.76869129347530 |
| 119 | Kyrgyzstan | 44.39568323683850 |
| 120 | Micronesia (Federated States) | 44.38547100303260 |
| 121 | Tuvalu | 44.16812931880130 |
| 122 | Marshall Islands | 43.22564579721090 |
| 123 | Democratic People's Republic of Korea | 42.91668360015330 |
| 124 | Viet Nam | 42.73264528480810 |
| 125 | Ecuador | 41.51691445887390 |
| 126 | Guatemala | 41.36998477355810 |
| 127 | Azerbaijan | 41.25609599883260 |
| 128 | South Africa | 41.03771408975590 |
| 129 | Nauru | 40.97158166940010 |
| 130 | Mozambique | 39.44550561712640 |
| 131 | Uzbekistan | 39.11717289004710 |
| 132 | Indonesia | 38.10940655989270 |
| 133 | Cambodia | 38.0211760469678 |
| 134 | Honduras | 37.66336407136710 |
| 135 | Egypt | 37.6161730452931 |
| 136 | Algeria | 37.26561111779890 |
| 137 | Guyana | 37.23791884404200 |
| 138 | Samoa | 36.69269336141790 |
| 139 | Suriname | 36.45101002898330 |
| 140 | Dominican Republic | 36.36602687520050 |
| 141 | Lao People's Democratic Republic | 35.05763862502780 |
| 142 | Lesotho | 35.05072873978110 |
| 143 | Iraq | 35.03624851368620 |
| 144 | Timor-Leste | 33.64446558502800 |
| 145 | Eswatini | 33.57128360974370 |
| 146 | Turkmenistan | 33.40213955841720 |
| 147 | Papua New Guinea | 32.95762280181920 |
| 148 | Kiribati | 32.94032971955930 |
| 149 | Botswana | 32.38388513803540 |
| 150 | Mongolia | 31.07914258409050 |
| 151 | Myanmar | 30.52410231596000 |
| 152 | Zimbabwe | 30.03184730032340 |
| 153 | Bolivia (Plurinational State) | 28.21647000468420 |
| 154 | Tajikistan | 28.10897960502700 |
| 155 | Gabon | 26.35962956235160 |
| 156 | Yemen | 26.3268162915572 |
| 157 | Congo | 25.89848320421810 |
| 158 | Morocco | 25.12994292302040 |
| 159 | Central African Republic | 24.71346065545090 |
| 160 | Haiti | 24.12227807111480 |
| 161 | Equatorial Guinea | 24.11556383489760 |
| 162 | Afghanistan | 23.80161643990720 |
| 163 | Cabo Verde | 22.81473462346770 |
| 164 | Namibia | 22.55646539063530 |
| 165 | Kenya | 22.2183411447411 |
| 166 | Somalia | 21.46437161267300 |
| 167 | Democratic Republic of the Congo | 21.12596281944800 |
| 168 | Eritrea | 20.03481057901880 |
| 169 | Uganda | 19.65161360093640 |
| 170 | Sudan | 19.57803420554500 |
| 171 | Ghana | 18.36904847246 |
| 172 | Comoros | 18.34453601343380 |
| 173 | Zambia | 18.02247668183470 |
| 174 | Rwanda | 17.26789047715110 |
| 175 | Burundi | 16.56079398650480 |
| 176 | Djibouti | 16.47569189221770 |
| 177 | Madagascar | 15.96975573095130 |
| 178 | Angola | 15.79177436494680 |
| 179 | South Sudan | 15.01121809562180 |
| 180 | Ethiopia | 14.40817888415450 |
| 181 | India | 14.1824782412313 |
| 182 | United Republic of Tanzania | 14.14679248283610 |
| 183 | Sao Tome and Principe | 14.09226868258850 |
| 184 | Mauritania | 13.49600151018350 |
| 185 | Mali | 11.62699705406210 |
| 186 | Guinea-Bissau | 10.82339019864690 |
| 187 | Malawi | 10.78869351548130 |
| 188 | Bhutan | 10.50218594323360 |
| 189 | Bangladesh | 9.936026330571350 |
| 190 | Togo | 8.881271227548130 |
| 191 | Gambia | 7.86396994939954 |
| 192 | Cameroon | 7.618004041858680 |
| 193 | Liberia | 7.558393859069280 |
| 194 | Nepal | 7.545519514583310 |
| 195 | Nigeria | 7.470455476627350 |
| 196 | Senegal | 7.166424839634950 |
| 197 | Chad | 6.695182418852560 |
| 198 | Côte d'Ivoire | 5.985572185522720 |
| 199 | Guinea | 5.969075426192130 |
| 200 | Burkina Faso | 5.5827492097835 |
| 201 | Niger | 5.063043641443630 |
| 202 | Pakistan | 4.783929005684800 |
| 203 | Sierra Leone | 4.19117130682381 |
| 204 | Benin | 3.643702879304300 |
