# Supplementary material for: Global assessment of the quality of care index for Burkitt Lymphoma from 1990 to 2021
Source: Research Square preprint supplement (doi:10.21203/rs.3.rs-7944023/v1), 2025-12-08
Supplement: Supplementary file 2 [file 957371c9f127becc27e64325.docx]

Supplementary Table 1. DALYs and temporal trends of Burkitt lymphoma in 1990 and 2021 at global, different SDI levels, and regions.

|  | 1990 | | 2021 | | 1900-2021 |
| --- | --- | --- | --- | --- | --- |
| DALYs cases  (95% UI) | Age-standardized DALY Rate (95% UI) | DALYs cases   (95% UI) | Age-standardized DALY Rate (95% UI) | EAPCs  (95% CI) |
| **Global** | 267498.641(157945.318 to 371555.399) | 4.624(2.821 to 6.369) | 392126.390(244124.879 to 512401.103) | 5.298(3.295 to 6.893) | 0.540(0.399 to 0.682) |
| **Socio-demographic index** |  |  |  |  |  |
| High SDI | 18598.388(13688.321 to 27178.340) | 2.086(1.538 to 3.013) | 34622.582(14670.503 to 59534.023) | 2.500(1.168 to 3.919) | 0.649(0.243 to 1.058) |
| High-middle SDI | 24455.433(15993.204 to 32626.737) | 2.405(1.563 to 3.226) | 24648.942(12086.834 to 38499.870) | 1.866(0.977 to 2.730) | -0.902(-1.029 to -0.775) |
| Middle SDI | 36328.771(24213.985 to 46317.399) | 1.957(1.327 to 2.489) | 42631.057(23919.238 to 57320.762) | 1.852(1.037 to 2.474) | -0.197(-0.400 to 0.006) |
| Low-middle SDI | 55105.845(29217.624 to 78748.392) | 3.622(1.975 to 5.110) | 83128.367(53946.974 to 107328.662) | 4.185(2.715 to 5.410) | 0.477(0.377 to 0.576) |
| Low SDI | 132822.717(59540.082 to 205071.325) | 18.356(8.330 to 27.888) | 206829.668(117687.288 to 279845.196) | 14.460(7.954 to 19.890) | -0.735(-0.790 to -0.680) |
| **Regions** |  |  |  |  |  |
| East Asia | 16520.825(7860.359 to 23815.725) | 1.424(0.674 to 2.055) | 9954.031(5085.354 to 13809.679) | 0.688(0.357 to 0.955) | -3.551(-4.066 to -3.034) |
| Oceania | 79.975(40.227 to 146.339) | 1.086(0.598 to 1.804) | 298.168(105.224 to 555.780) | 2.006(0.748 to 3.746) | 2.097(1.848 to 2.347) |
| Southeast Asia | 4516.414(1943.469 to 7642.778) | 0.885(0.412 to 1.422) | 7126.457(3708.863 to 9826.901) | 1.058(0.547 to 1.470) | -0.016(-0.322 to 0.292) |
| Eastern Europe | 3713.954(2353.985 to 5336.083) | 1.825(1.145 to 2.586) | 2245.101(921.476 to 3662.485) | 1.193(0.490 to 1.857) | -0.965(-1.215 to -0.714) |
| Central Europe | 1650.584(1089.909 to 2655.246) | 1.343(0.878 to 2.192) | 2093.564(798.264 to 3666.078) | 1.626(0.662 to 2.642) | 0.779(0.306 to 1.254) |
| Australasia | 387.683(271.353 to 570.352) | 1.928(1.356 to 2.826) | 672.825(279.243 to 1359.262) | 1.834(0.806 to 3.368) | -0.300(-0.748 to 0.150) |
| High-income Asia Pacific | 2257.568(1203.633 to 3555.883) | 1.291(0.710 to 1.994) | 4350.555(1639.813 to 7625.182) | 1.548(0.622 to 2.488) | 0.559(0.182 to 0.936) |
| Central Asia | 735.315(455.679 to 1142.433) | 0.990(0.608 to 1.502) | 480.614(286.018 to 744.793) | 0.505(0.301 to 0.781) | -2.437(-2.822 to -2.051) |
| Caribbean | 2109.358(1312.997 to 3716.377) | 5.731(3.592 to 9.917) | 2246.361(1181.057 to 3576.977) | 4.975(2.549 to 8.327) | 0.337(0.073 to 0.601) |
| Andean Latin America | 2015.955(1378.367 to 3207.629) | 4.495(3.123 to 7.134) | 2613.184(1300.762 to 4129.294) | 4.044(2.004 to 6.412) | -0.545(-0.717 to -0.372) |
| Western Europe | 7777.587(5673.636 to 11861.275) | 1.955(1.436 to 3.012) | 14911.730(4704.753 to 33539.402) | 2.606(0.880 to 5.291) | 0.982(0.559 to 1.406) |
| Tropical Latin America | 7753.738(5691.117 to 11180.673) | 4.789(3.519 to 6.885) | 11986.622(6031.886 to 17293.759) | 5.314(2.713 to 7.436) | 0.424(0.026 to 0.824) |
| Southern Latin America | 3038.184(2144.319 to 4413.558) | 6.113(4.314 to 8.887) | 4874.851(2541.773 to 7927.115) | 6.853(3.621 to 10.841) | 0.617(0.496 to 0.738) |
| High-income North America | 8967.340(6405.094 to 13016.132) | 3.106(2.212 to 4.478) | 17133.563(8188.777 to 26369.546) | 3.665(1.918 to 5.306) | 0.751(0.309 to 1.195) |
| Central Latin America | 6406.954(4645.328 to 9602.103) | 3.613(2.582 to 5.356) | 10143.070(5526.563 to 14342.418) | 4.085(2.234 to 5.745) | 0.460(0.266 to 0.654) |
| North Africa and Middle East | 13223.654(8034.611 to 20936.322) | 3.263(1.999 to 5.048) | 13998.791(8842.218 to 20900.633) | 2.257(1.410 to 3.359) | -1.168(-1.284 to -1.051) |
| South Asia | 25927.173(10041.307 to 42609.766) | 1.803(0.710 to 2.907) | 28884.219(14371.555 to 44146.610) | 1.591(0.794 to 2.445) | -0.600(-0.731 to -0.470) |
| Southern Sub-Saharan Africa | 1236.171(739.059 to 1792.933) | 1.919(1.151 to 2.752) | 3138.014(1507.231 to 4766.983) | 3.826(1.845 to 5.782) | 2.708(2.414 to 3.003) |
| Western Sub-Saharan Africa | 58822.297(27332.760 to 85495.221) | 20.293(9.254 to 29.463) | 113757.842(61740.554 to 153665.353) | 16.748(8.957 to 22.734) | -0.468(-0.593 to -0.343) |
| Eastern Sub-Saharan Africa | 86912.974(37953.778 to 132911.875) | 31.837(13.576 to 48.685) | 123943.176(67529.378 to 172503.381) | 23.374(12.149 to 33.716) | -1.014(-1.059 to -0.970) |
| Central Sub-Saharan Africa | 13444.937(5301.951 to 23351.094) | 17.393(6.877 to 29.541) | 17273.652(8387.618 to 25228.166) | 10.795(4.739 to 16.419) | -1.451(-1.541 to -1.361) |
